# Supplementary material for: Genetic Programming by Nitric Oxide-Sensing Gene Switch System in Tumor-Targeting Bacteria
Source: MDPI journal article supplement (doi:10.3390/bios13020266), 2023-02-13
Supplement: s1 [file s1]

Supplementary Materials

# Genetic Programming by Nitric Oxide-Sensing Gene Switch System in Tumor-Targeting Bacteria

Yeshan Qin <sup>1,2</sup> Sung-Hwan You <sup>2</sup> Ying Zhang <sup>1,2</sup> Akhil Venu <sup>2</sup> Yeongjin Hong <sup>3,\*</sup> and Jung-Joon Min <sup>1,2,4,\*</sup>

<sup>1</sup> Department of Molecular Medicine, Chonnam National University Graduate School, 61469 Gwangju, Republic of Korea; 186237@jnu.ac.kr (Y.Q.); 188675@jnu.ac.kr (Y.Z.)

<sup>2</sup> Institute for Molecular Imaging and Theranostics, Hwasun Hospital, Chonnam National University Medical School, 58128 Hwasun, Republic of Korea; yshyoou@naver.com (S.-H. Y); 177894@jnu.ac.kr (A.V.)

<sup>3</sup> Department of Microbiology, Chonnam National University Medical School, 58128 Hwasun, Republic of Korea

<sup>4</sup> Department of Nuclear Medicine, Chonnam National University Medical School, 61469 Gwangju, Republic of Korea

\* Correspondence: jjmin@jnu.ac.kr (J.-J.M.); yjhong@jnu.ac.kr (Y.H.);

Tel.: +82-61-379-2876 (J.-J.M.); +82-61-379-2746 (Y.H.);

Fax: +82-61-379-2875 (J.-J.M.); +82-61-379-2875 (Y.H.)

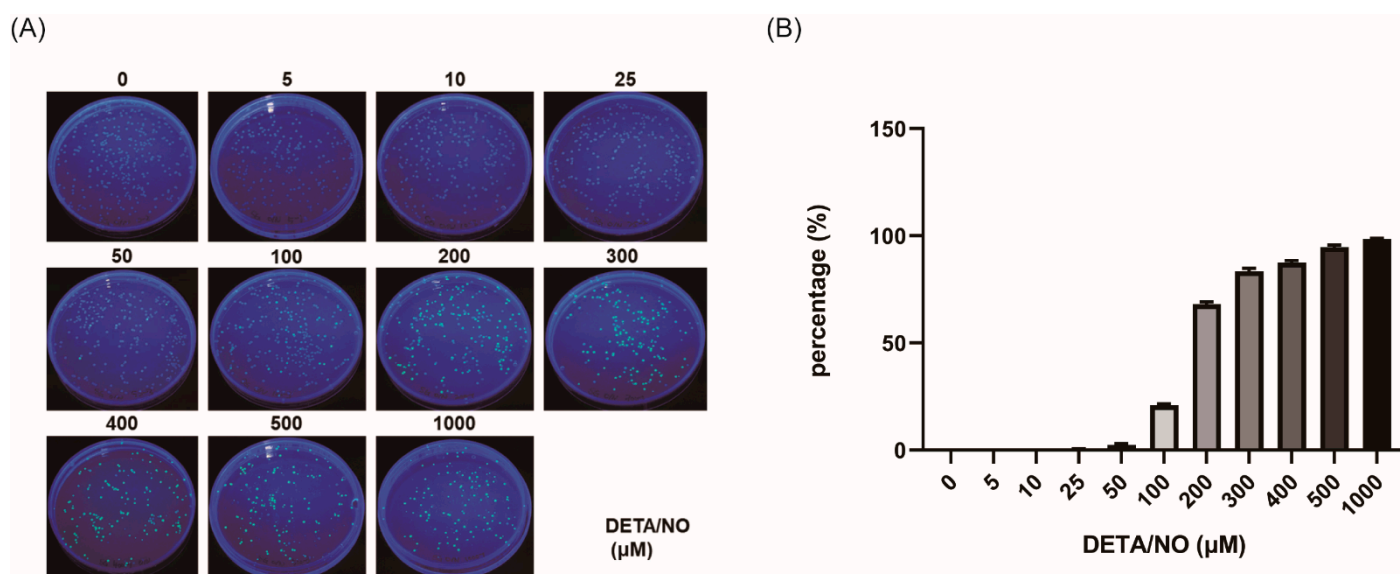

**Figure S1.** Switch activation percentage under various concentrations of DETA/NO. *SL. pNASGFP* were incubated with the indicated concentrations of DETA/NO for 16 h at 37°C. The bacteria were spread on agar plates containing antibiotics and cultured overnight. (A) Representative UV photos of sfGFP-positive colonies on agar plates. (B) Percentages of activated switching in *SL. pNASGFP* at the indicated concentrations of DETA/NO. Percentages (mean ± SEM) were calculated as the number of sfGFP-positive colonies relative to total colonies. Assays were performed in triplicate.

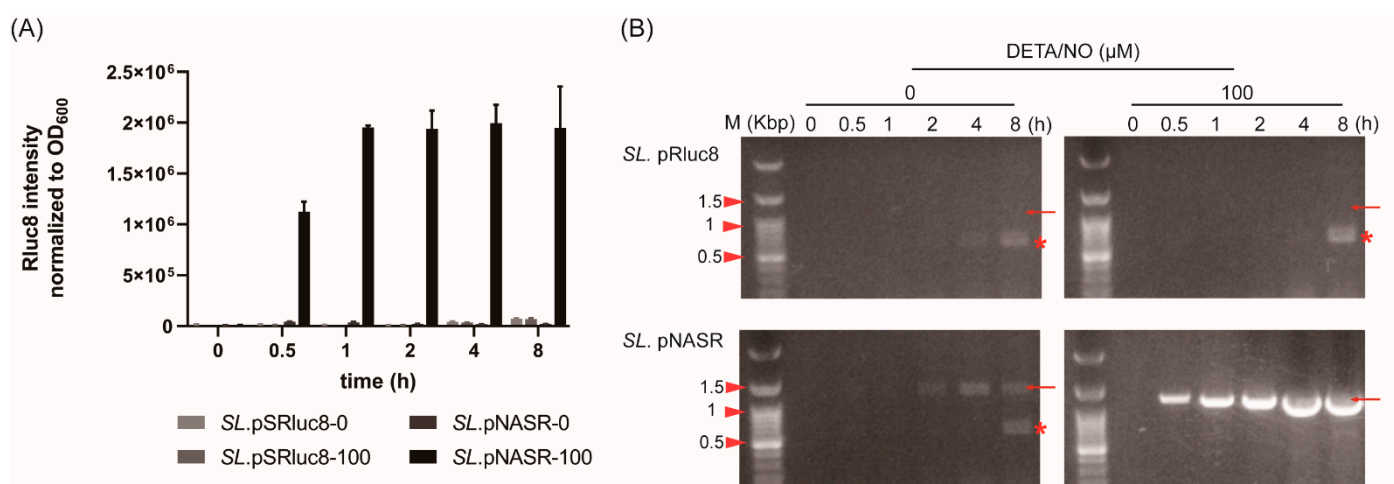

**Figure S2.** Time-dependent switch event in bacterial cells with the NO-sensing switch system. *SL. pNASR* was cultured for the indicated times in the presence (100 μM) or absence (0 μM) of DETA/NO; *SL. pSRluc8* was used as the negative control. (A) Rluc8 intensity normalized to number of bacterial cells (OD<sub>600</sub>). (B) PCR analysis of gene switch events. The switched genes were amplified with ON-state primers (arrows). \*, non-specific bands. Results shown as the mean ± SEM of triplicate determinations.

**Table S1.** Plasmids and *SL. ΔppGpp* transformants.

| Plasmid | Constructs                                                                          | Antibiotic resistance |
|---------|-------------------------------------------------------------------------------------|-----------------------|
| pFimE   | NO inducible FimE expression                                                        | Chloramphenicol       |
| pSRluc8 | <i>rluc8</i> as GOI in <i>fimS</i> switch block, with constitutively expressed NorR | Ampicillin            |
| pSGFP   | <i>sfGFP</i> as GOI in <i>fimS</i> switch block, with constitutively expressed NorR | Ampicillin            |

  

| Strain             | Genotype                            | Purpose                       |
|--------------------|-------------------------------------|-------------------------------|
| <i>SL. pSRluc8</i> | <i>SL. ΔppGpp</i> + pSRluc8         | Control                       |
| <i>SL. pNASR</i>   | <i>SL. ΔppGpp</i> + pFimE + pSRluc8 | <i>rluc8</i> as reporter gene |
| <i>SL. pNASGFP</i> | <i>SL. ΔppGpp</i> + pFimE + pSGFP   | <i>sfGFP</i> as reporter gene |

GOI: gene of interest.

*rluc8*: *renilla* luciferase variant 8

*sfGFP*: *super-folder green fluorescent protein*.
